# Supplementary material for: Postpartum depression screening: are we doing a competent job?
Source: PubMed Central journal article supplement — BMJ Open Qual. 2019 Oct 13;8(4):e000616. doi: 10.1136/bmjoq-2018-000616 (PMC6797414; doi:10.1136/bmjoq-2018-000616), 2019-10-13
Supplement: bmjoq-2018-000616supp001.pdf [file bmjoq-2018-000616supp001.pdf]

### Survey Instrument for the Postpartum depression screen- PDSA 1

1. Do you assess postpartum depression in mothers during the well-child visit of her baby?  
a) Never                      b) Rarely                      c) Sometimes                      d) Mostly.
  
2. If you do assess postpartum depression, at which well-child visits do you do? Check all that applies.  
  
a) Newborn                      b) 1-month                      c) 2 months                      d) 4 months
  
3. Do you know the guidelines for the American Academy of Pediatrics (AAP) regarding screening for postpartum depression?  
  
a) No, I do not know    b) I have heard about them    c) Yes, I know them.
  
4. Do you use a validated questionnaire to screen for postpartum depression?  
  
a) Yes                      b) No  
  
If Yes, which questionnaire do you use? -----
  
5. In your best estimate, what would be the guidelines of AAP for screening postpartum depression?  
  
a) Newborn only                      b) newborn and 1-month visit                      c) 1- and 2-months visits  
  
d) 1, 2- and 4-month visits
