# Supplementary material for: Postpartum depression screening: are we doing a competent job?
Source: PubMed Central journal article supplement — BMJ Open Qual. 2019 Oct 13;8(4):e000616. doi: 10.1136/bmjoq-2018-000616 (PMC6797414; doi:10.1136/bmjoq-2018-000616), 2019-10-13

**Final Clinic Flow Protocol for Postpartum Depression Screening**

Population: All mothers of infants who present at 2 month and 4 months well visits

Visit: Well Child visit

Frequency: 2 times at 2- and 4-month visits

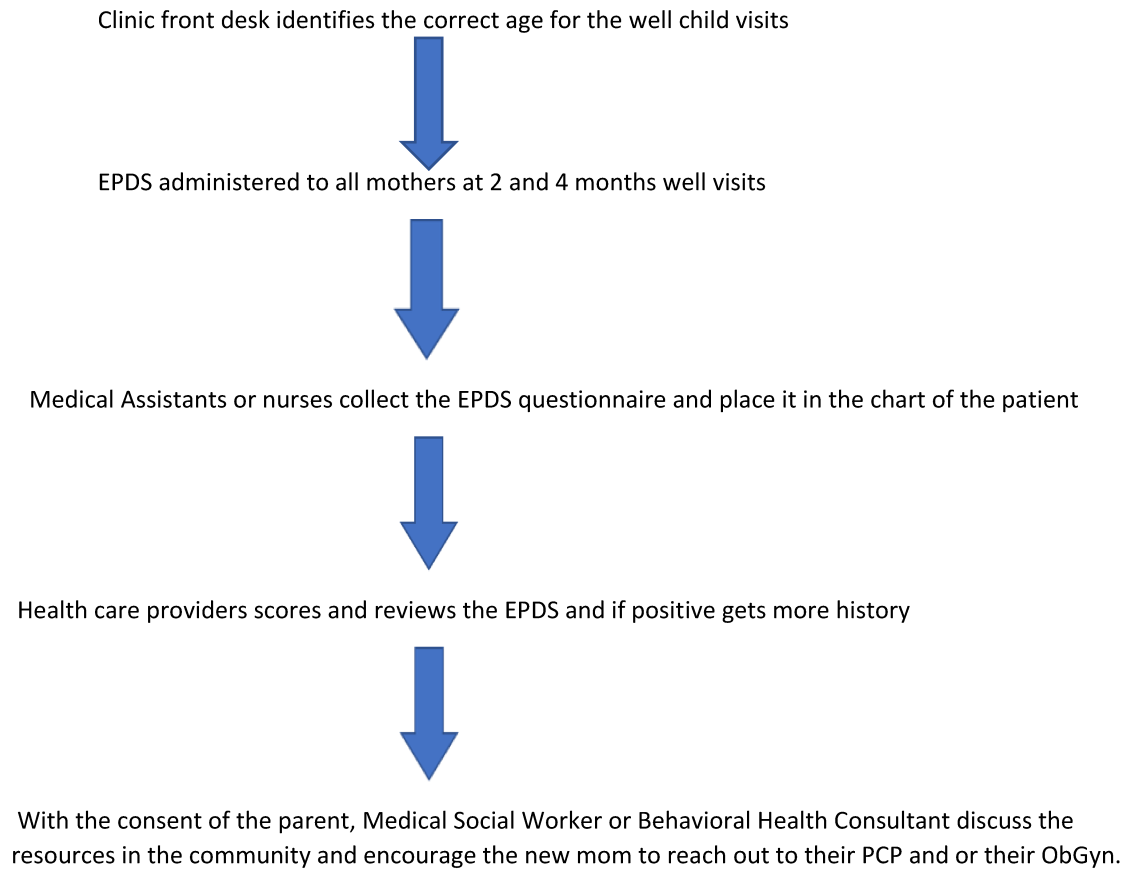

Supplement: bmjoq-2018-000616supp002.pdf [file bmjoq-2018-000616supp002.pdf]
